# Supplementary material
Source: Research Square preprint supplement (doi:10.21203/rs.3.rs-8935828/v1)
Supplement: Supplementary file 1 [file 01a6682ee7ffe7f917128863.docx]

**Appendix A**: Interview guide for pharmacists (English version)

1. What is your perspective on prescribing errors in the ward where you work? can you tell me how often you encounter them?

2. What are the most common types of prescribing errors in the ward where you work?

3. According to your experience, what do you think the effect of prescribing errors to patients in the ward that you work in?

4. According to your experience, what do you think the cause for developing prescribing errors?

5. What are the tools you use to check for medication errors in the drugs prescribed by the physician (prompt: written sources, mobile applications or websites). What is the most commonly used tool in your daily clinical practice?

Additional probes on the most commonly used tools:

A. What are the benefits that you get from these tools in prevention or reducing the prescribing errors?

B. What are challenges that you face while using these tools?

C. What is the frequency of your usage to these tools?

6. What do you do when you detect a prescribing error? Please give explain.

7. What are the current measures that you apply in your institution to prevent or at least reduce prescribing errors?

8. What are your recommendations to reduce prescribing errors?

9. Do you have any further comments to add?

**Appendix A**: Interview guide for pharmacists (Arabic version)

1.ماهي تصوراتك بخصوص الاخطاء في وصف الادوية في الردهة التي تعمل فيها؟ هل يمكنك ان تحدثني عن نسبة حدوثها؟

2.ما هي اكثر أنواع الأخطاء شيوعا في وصف الادوية في الردهة التي تعمل بها؟

3.حسب خبرتك ما هو باعتقادك تأثير الاخطاء في وصف الادوية على المرضى في الردهة التي تعمل بها؟

4. من خلال تجربتك، ماهو برأيك اسباب حدوث اخطاء في وصف الادوية؟

5. ماهي الأدوات التي تستخدمها للتحقق من عدم وجود اخطاء دوائية في الأدوية التي يصفها الطبيب (موجه: مصادر ورقية, تطبيقات موبايل, مواقع الكترونية). وماهي الأداة الأكثر استخداما في ممارستك السريرية اليومية؟

اسئلة اضافية بالنسبة للأداة الاكثر استخداما:

أ. ماهي الفوائد التي تحصل عليها من هذه الأدوات في الوقاية أو تقليل الأخطاء الدوائية في الوصفات الطبية؟

ب. ماهي التحديات التي تواجهها عند استخدام هذه الأدوات؟

ج –ما مدى استخدامك لهذه الأدوات؟

6.ماذا تفعل عندما تكتشف خطأ في وصف الادوية؟يرجى التوضيح

7.ماهي الاجراءات الحالية المعمول بها في مؤسستكم لمنع الاخطاء في وصف الادوية او على الاقل تقليلها؟

8.ما هي توصياتك للحد من اخطاء وصف الدواء؟

9. هل لديك أي تعليقات أخرى تود إضافتها؟
